# Supplementary material for: Tropospheric ozone precursors: global and regional distributions, trends, and variability
Source: Copernicus journal article supplement (doi:10.5194/acp-24-12225-2024), 2024-11-05
Supplement: Supplementary file 1 [file acp-24-12225-2024-supplement.pdf]

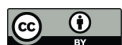

*Supplement of*

## **Tropospheric ozone precursors: global and regional distributions, trends, and variability**

**Yasin Elshorbany et al.**

*Correspondence to:* Yasin Elshorbany (elshorbany@usf.edu)

The copyright of individual parts of the supplement might differ from the article licence.

Table S 1: List of ozone sonde stations used in the study.

| Station          | Country or region | Latitude | Longitude | Source   | Link                                                                                                                        |
|------------------|-------------------|----------|-----------|----------|-----------------------------------------------------------------------------------------------------------------------------|
| Alert            | Canada            | 82.50    | -62.30    | HEGIFTOM | <a href="https://hegiftom.meteo.be/">https://hegiftom.meteo.be/</a>                                                         |
| Eureka           | Canada            | 80.05    | -86.42    | HEGIFTOM | <a href="https://hegiftom.meteo.be/">https://hegiftom.meteo.be/</a>                                                         |
| Resolute         | Canada            | 74.72    | -97.98    | HEGIFTOM | <a href="https://hegiftom.meteo.be/">https://hegiftom.meteo.be/</a>                                                         |
| Churchill        | Canada            | 58.74    | -94.07    | HEGIFTOM | <a href="https://hegiftom.meteo.be/">https://hegiftom.meteo.be/</a>                                                         |
| Edmonton         | Canada            | 53.55    | -114.10   | HEGIFTOM | <a href="https://hegiftom.meteo.be/">https://hegiftom.meteo.be/</a>                                                         |
| Goose Bay        | Canada            | 53.30    | -60.39    | HEGIFTOM | <a href="https://hegiftom.meteo.be/">https://hegiftom.meteo.be/</a>                                                         |
| Legionowo        | Poland            | 52.40    | 20.97     | HEGIFTOM | <a href="https://hegiftom.meteo.be/">https://hegiftom.meteo.be/</a>                                                         |
| De Bilt          | Netherlands       | 52.10    | 5.18      | HEGIFTOM | <a href="https://hegiftom.meteo.be/">https://hegiftom.meteo.be/</a>                                                         |
| Uccle            | Belgium           | 50.80    | 4.36      | HEGIFTOM | <a href="https://hegiftom.meteo.be/">https://hegiftom.meteo.be/</a>                                                         |
| Kelowna          | Canada            | 49.93    | -119.40   | HEGIFTOM | <a href="https://hegiftom.meteo.be/">https://hegiftom.meteo.be/</a>                                                         |
| Payerne          | Switzerland       | 46.81    | 6.94      | HEGIFTOM | <a href="https://hegiftom.meteo.be/">https://hegiftom.meteo.be/</a>                                                         |
| Yarmouth         | Canada            | 43.87    | -66.11    | HEGIFTOM | <a href="https://hegiftom.meteo.be/">https://hegiftom.meteo.be/</a>                                                         |
| Madrid           | Spain             | 40.45    | -3.72     | HEGIFTOM | <a href="https://hegiftom.meteo.be/">https://hegiftom.meteo.be/</a>                                                         |
| Izaña            | Spain             | 28.30    | -16.48    | HEGIFTOM | <a href="https://hegiftom.meteo.be/">https://hegiftom.meteo.be/</a>                                                         |
| Paramaribo       | Suriname          | 5.81     | -55.21    | HEGIFTOM | <a href="https://hegiftom.meteo.be/">https://hegiftom.meteo.be/</a>                                                         |
| Lauder           | New Zealand       | -45.04   | 169.68    | HEGIFTOM | <a href="https://hegiftom.meteo.be/">https://hegiftom.meteo.be/</a>                                                         |
| Ny-Ålesund       | Norway            | 78.91    | 11.88     | NDACC    | <a href="https://www-air.larc.nasa.gov/missions/ndacc/data.html">https://www-air.larc.nasa.gov/missions/ndacc/data.html</a> |
| Thule            | Greenland         | 76.53    | -68.74    | NDACC    | <a href="https://www-air.larc.nasa.gov/missions/ndacc/data.html">https://www-air.larc.nasa.gov/missions/ndacc/data.html</a> |
| Scoresbysund     | Greenland         | 70.48    | -21.97    | NDACC    | <a href="https://www-air.larc.nasa.gov/missions/ndacc/data.html">https://www-air.larc.nasa.gov/missions/ndacc/data.html</a> |
| Sodankylä        | Finland           | 67.37    | 26.65     | NDACC    | <a href="https://www-air.larc.nasa.gov/missions/ndacc/data.html">https://www-air.larc.nasa.gov/missions/ndacc/data.html</a> |
| Haute Provence   | France            | 43.94    | 5.71      | NDACC    | <a href="https://www-air.larc.nasa.gov/missions/ndacc/data.html">https://www-air.larc.nasa.gov/missions/ndacc/data.html</a> |
| Dumont d'Urville | Antarctica        | -66.67   | 140.00    | NDACC    | <a href="https://www-air.larc.nasa.gov/missions/ndacc/data.html">https://www-air.larc.nasa.gov/missions/ndacc/data.html</a> |
| Neumayer         | Antarctica        | -70.65   | -8.25     | NDACC    | <a href="https://www-air.larc.nasa.gov/missions/ndacc/data.html">https://www-air.larc.nasa.gov/missions/ndacc/data.html</a> |
| McMurdo          | Antarctica        | -77.85   | 166.67    | NDACC    | <a href="https://www-air.larc.nasa.gov/missions/ndacc/data.html">https://www-air.larc.nasa.gov/missions/ndacc/data.html</a> |

| Station               | Country or region         | Latitude | Longitude | Source | Link                                                                                                                        |
|-----------------------|---------------------------|----------|-----------|--------|-----------------------------------------------------------------------------------------------------------------------------|
| Belgrano              | Antarctica                | -77.87   | -34.62    | NDACC  | <a href="https://www-air.larc.nasa.gov/missions/ndacc/data.html">https://www-air.larc.nasa.gov/missions/ndacc/data.html</a> |
| Summit                | Greenland                 | 72.34    | -38.29    | NOAA   | <a href="ftp://ftp.gml.noaa.gov/data/ozwv/Ozonesonde/">ftp://ftp.gml.noaa.gov/data/ozwv/Ozonesonde/</a>                     |
| Trinidad Head         | United States             | 40.80    | -124.16   | NOAA   | <a href="ftp://ftp.gml.noaa.gov/data/ozwv/Ozonesonde/">ftp://ftp.gml.noaa.gov/data/ozwv/Ozonesonde/</a>                     |
| Boulder ESRL HQ (CO)  | United States             | 39.99    | -105.26   | NOAA   | <a href="ftp://ftp.gml.noaa.gov/data/ozwv/Ozonesonde/">ftp://ftp.gml.noaa.gov/data/ozwv/Ozonesonde/</a>                     |
| Huntsville            | United States             | 34.72    | -86.64    | NOAA   | <a href="ftp://ftp.gml.noaa.gov/data/ozwv/Ozonesonde/">ftp://ftp.gml.noaa.gov/data/ozwv/Ozonesonde/</a>                     |
| South Pole            | Antarctica                | -90.00   | -169.00   | NOAA   | <a href="ftp://ftp.gml.noaa.gov/data/ozwv/Ozonesonde/">ftp://ftp.gml.noaa.gov/data/ozwv/Ozonesonde/</a>                     |
| Wallops Island        | United States             | 37.93    | -75.47    | SHADOZ | <a href="https://tropo.gsfc.nasa.gov/shadoz/Archive.html">https://tropo.gsfc.nasa.gov/shadoz/Archive.html</a>               |
| Hanoi                 | Vietnam                   | 21.01    | 105.80    | SHADOZ | <a href="https://tropo.gsfc.nasa.gov/shadoz/Archive.html">https://tropo.gsfc.nasa.gov/shadoz/Archive.html</a>               |
| Hilo (HI)             | Northeastern Pacific      | 19.58    | -155.07   | SHADOZ | <a href="https://tropo.gsfc.nasa.gov/shadoz/Archive.html">https://tropo.gsfc.nasa.gov/shadoz/Archive.html</a>               |
| Costa Rica            | Costa Rica                | 9.94     | -84.04    | SHADOZ | <a href="https://tropo.gsfc.nasa.gov/shadoz/Archive.html">https://tropo.gsfc.nasa.gov/shadoz/Archive.html</a>               |
| Kuala Lumpur          | Malaysia                  | 2.73     | 101.27    | SHADOZ | <a href="https://tropo.gsfc.nasa.gov/shadoz/Archive.html">https://tropo.gsfc.nasa.gov/shadoz/Archive.html</a>               |
| San Cristobal         | Galapagos                 | -0.92    | -89.62    | SHADOZ | <a href="https://tropo.gsfc.nasa.gov/shadoz/Archive.html">https://tropo.gsfc.nasa.gov/shadoz/Archive.html</a>               |
| Nairobi               | Kenya                     | -1.30    | 36.75     | SHADOZ | <a href="https://tropo.gsfc.nasa.gov/shadoz/Archive.html">https://tropo.gsfc.nasa.gov/shadoz/Archive.html</a>               |
| Natal                 | Brazil                    | -6.00    | -35.20    | SHADOZ | <a href="https://tropo.gsfc.nasa.gov/shadoz/Archive.html">https://tropo.gsfc.nasa.gov/shadoz/Archive.html</a>               |
| WatuKosek             | Java                      | -7.50    | 112.60    | SHADOZ | <a href="https://tropo.gsfc.nasa.gov/shadoz/Archive.html">https://tropo.gsfc.nasa.gov/shadoz/Archive.html</a>               |
| Ascension             | South Atlantic            | -7.58    | -14.24    | SHADOZ | <a href="https://tropo.gsfc.nasa.gov/shadoz/Archive.html">https://tropo.gsfc.nasa.gov/shadoz/Archive.html</a>               |
| Samoa (Cape Matatula) | Southeastern Pacific      | -14.25   | -170.56   | SHADOZ | <a href="https://tropo.gsfc.nasa.gov/shadoz/Archive.html">https://tropo.gsfc.nasa.gov/shadoz/Archive.html</a>               |
| Fiji                  | South Pacific             | -18.13   | 178.40    | SHADOZ | <a href="https://tropo.gsfc.nasa.gov/shadoz/Archive.html">https://tropo.gsfc.nasa.gov/shadoz/Archive.html</a>               |
| La Réunion            | Southwestern Indian Ocean | -21.08   | 55.38     | SHADOZ | <a href="https://tropo.gsfc.nasa.gov/shadoz/Archive.html">https://tropo.gsfc.nasa.gov/shadoz/Archive.html</a>               |
| Irene                 | South Africa              | -25.90   | 28.22     | SHADOZ | <a href="https://tropo.gsfc.nasa.gov/shadoz/Archive.html">https://tropo.gsfc.nasa.gov/shadoz/Archive.html</a>               |

| Station          | Country or region | Latitude | Longitude | Source | Link                                                                                                |
|------------------|-------------------|----------|-----------|--------|-----------------------------------------------------------------------------------------------------|
| Idabel           | United States     | 33.90    | -94.75    | TOPP   | <a href="http://www.ruf.rice.edu/%7Eozone/">http://www.ruf.rice.edu/%7Eozone/</a>                   |
| Houston          | United States     | 29.72    | -95.34    | TOPP   | <a href="http://www.ruf.rice.edu/%7Eozone/">http://www.ruf.rice.edu/%7Eozone/</a>                   |
| Quito            | Ecuador           | -0.20    | -78.44    | USFQ   | <a href="https://observaciones-ia.usfq.edu.ec/">https://observaciones-ia.usfq.edu.ec/</a>           |
| Lerwick          | United Kingdom    | 60.13    | -1.10     | WOUDC  | <a href="https://woudc.org/data/explore.php?lang=en">https://woudc.org/data/explore.php?lang=en</a> |
| Lindenberg       | Germany           | 52.21    | 14.12     | WOUDC  | <a href="https://woudc.org/data/explore.php?lang=en">https://woudc.org/data/explore.php?lang=en</a> |
| Valentia         | Ireland           | 51.94    | -10.25    | WOUDC  | <a href="https://woudc.org/data/explore.php?lang=en">https://woudc.org/data/explore.php?lang=en</a> |
| Prague           | Czech Republic    | 50.01    | 14.45     | WOUDC  | <a href="https://woudc.org/data/explore.php?lang=en">https://woudc.org/data/explore.php?lang=en</a> |
| Hohenpeissenberg | Germany           | 47.80    | 11.01     | WOUDC  | <a href="https://woudc.org/data/explore.php?lang=en">https://woudc.org/data/explore.php?lang=en</a> |
| Sapporo          | Japan             | 43.06    | 141.33    | WOUDC  | <a href="https://woudc.org/data/explore.php?lang=en">https://woudc.org/data/explore.php?lang=en</a> |
| Tateno (Tsukuba) | Japan             | 36.10    | 140.13    | WOUDC  | <a href="https://woudc.org/data/explore.php?lang=en">https://woudc.org/data/explore.php?lang=en</a> |
| Naha             | Japan             | 26.20    | 127.68    | WOUDC  | <a href="https://woudc.org/data/explore.php?lang=en">https://woudc.org/data/explore.php?lang=en</a> |
| Hong Kong        | China             | 22.31    | 114.17    | WOUDC  | <a href="https://woudc.org/data/explore.php?lang=en">https://woudc.org/data/explore.php?lang=en</a> |
| Broadmeadows     | Australia         | -37.69   | 144.95    | WOUDC  | <a href="https://woudc.org/data/explore.php?lang=en">https://woudc.org/data/explore.php?lang=en</a> |
| Macquarie Island | Australia         | -54.50   | 158.94    | WOUDC  | <a href="https://woudc.org/data/explore.php?lang=en">https://woudc.org/data/explore.php?lang=en</a> |
| Marambio         | Antarctica        | -64.24   | -56.62    | WOUDC  | <a href="https://woudc.org/data/explore.php?lang=en">https://woudc.org/data/explore.php?lang=en</a> |
| Davis            | Australia         | -68.58   | 77.97     | WOUDC  | <a href="https://woudc.org/data/explore.php?lang=en">https://woudc.org/data/explore.php?lang=en</a> |
| Syowa            | Antarctica        | -69.00   | 39.58     | WOUDC  | <a href="https://woudc.org/data/explore.php?lang=en">https://woudc.org/data/explore.php?lang=en</a> |

### CO MOPITT and CAM-chem simulation:

We compare simulations made by the Community Atmosphere Model with chemistry (CAM-chem) of the Community Earth System Model (CESM) version 2.1. The model is run at nominal  $1^\circ \times 1^\circ$ , with comprehensive tropospheric and stratospheric chemistry, and includes nudging to the MERRA-2 reanalysis (Danabasoglu et al., 2020; Emmons et al., 2020). A baseline simulation uses the daily Quick-Fire Emissions Dataset (QFED) and monthly anthropogenic inventory from CAMS-GLOB-ANTv5.1 (Soulié et al., 2023). The anthropogenic CO emissions were replaced by the Community Emissions Data System version 2 or CEDSv2 (McDuffie et al., 2020).

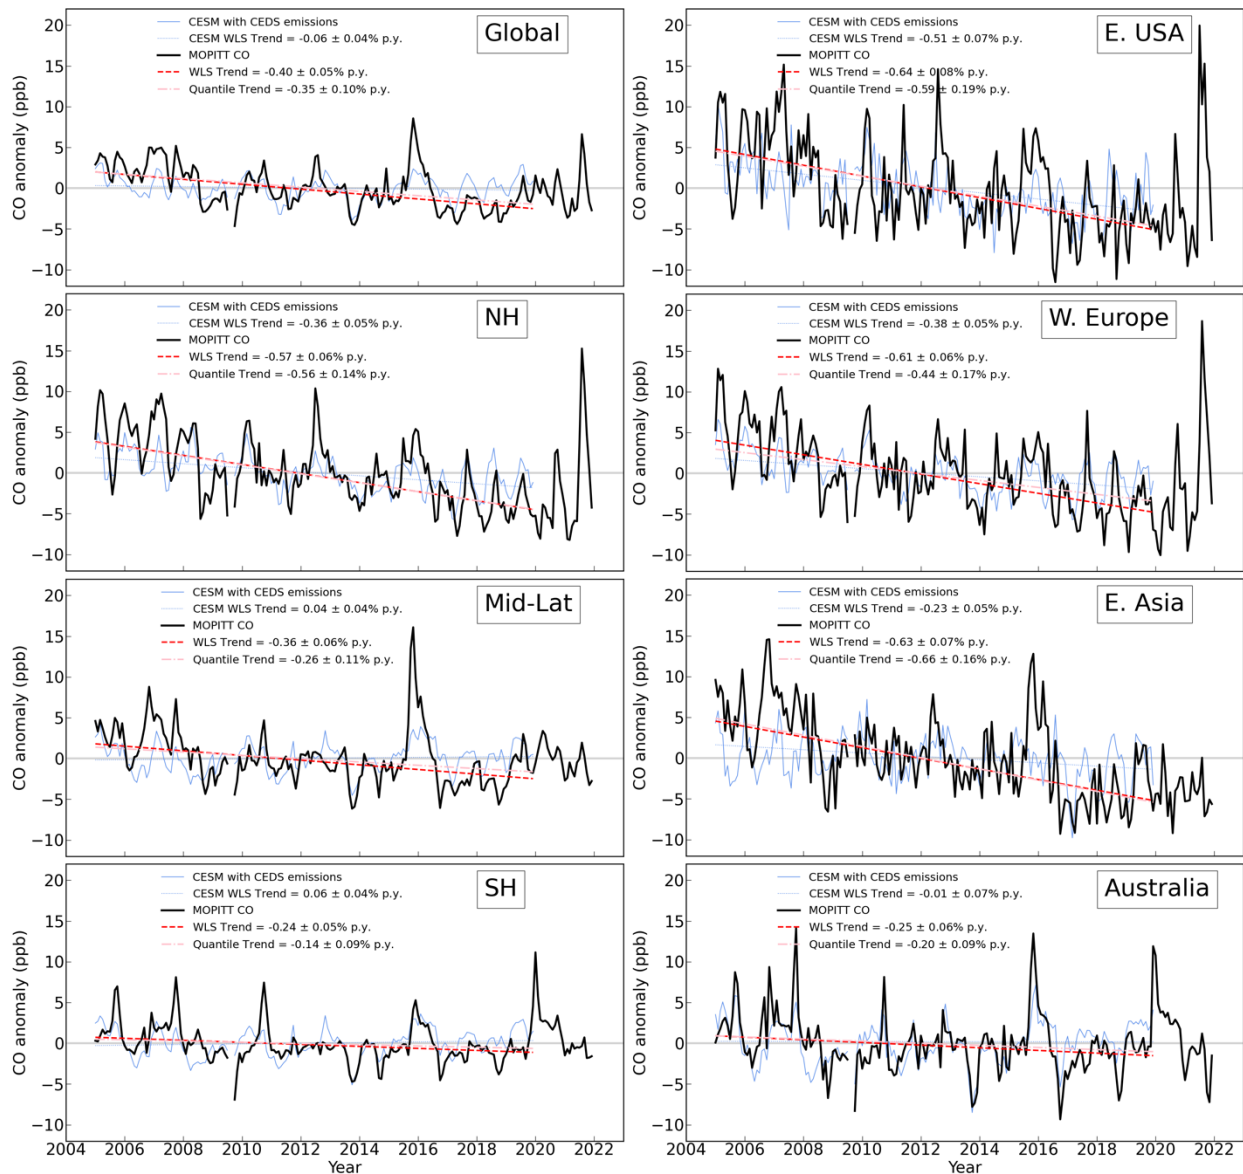

Figure S 1: MOPITT monthly average CO anomalies in column average volume mixing ratio (VMR), 2005-2021 (black). Updated dataset based on Buchholz et al. (2021). Data is Level 3, monthly average daytime observations, using version 9 joint NIR/TIR retrievals. Regions are defined in Figures 10 and 11. Trends are calculated on anomalies 2005-2019. The weighted Least Squares trend (red) is weighted by the monthly regional standard deviation. The quantile regression trend is also shown (pink). The quantile regression trend is also shown (pink). Grey line indicates zero. CESM simulation results are shown as a comparison. Model output was

convolved with the MOPITT averaging kernel prior to calculating regional month average CO anomalies (blue solid line) and WLS trends (blue dotted line).

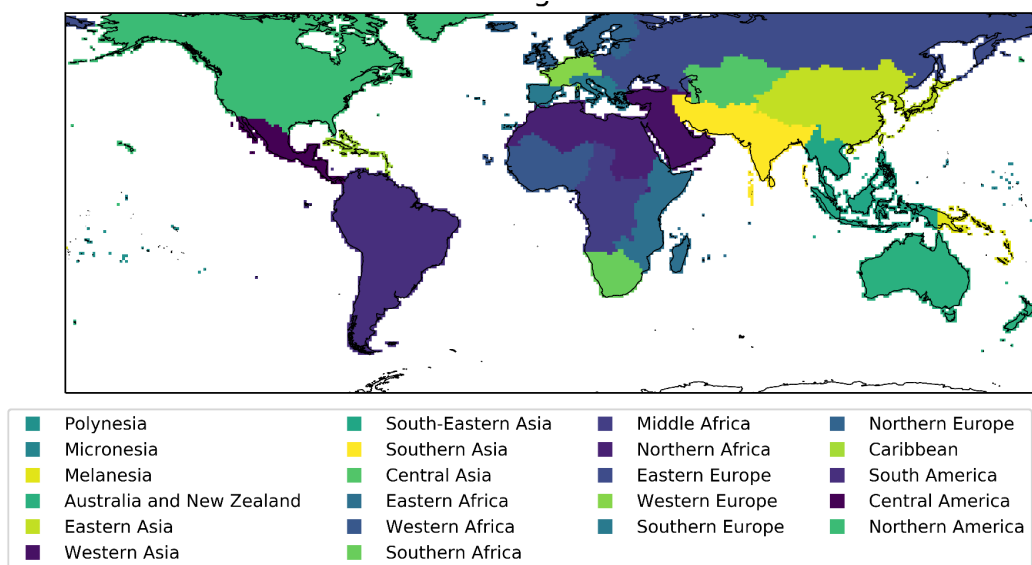

Figure S 2: Map of the regions used for computing the regional OMI QA4ECV TrC-NO<sub>2</sub> and TrC-HCHO trends.

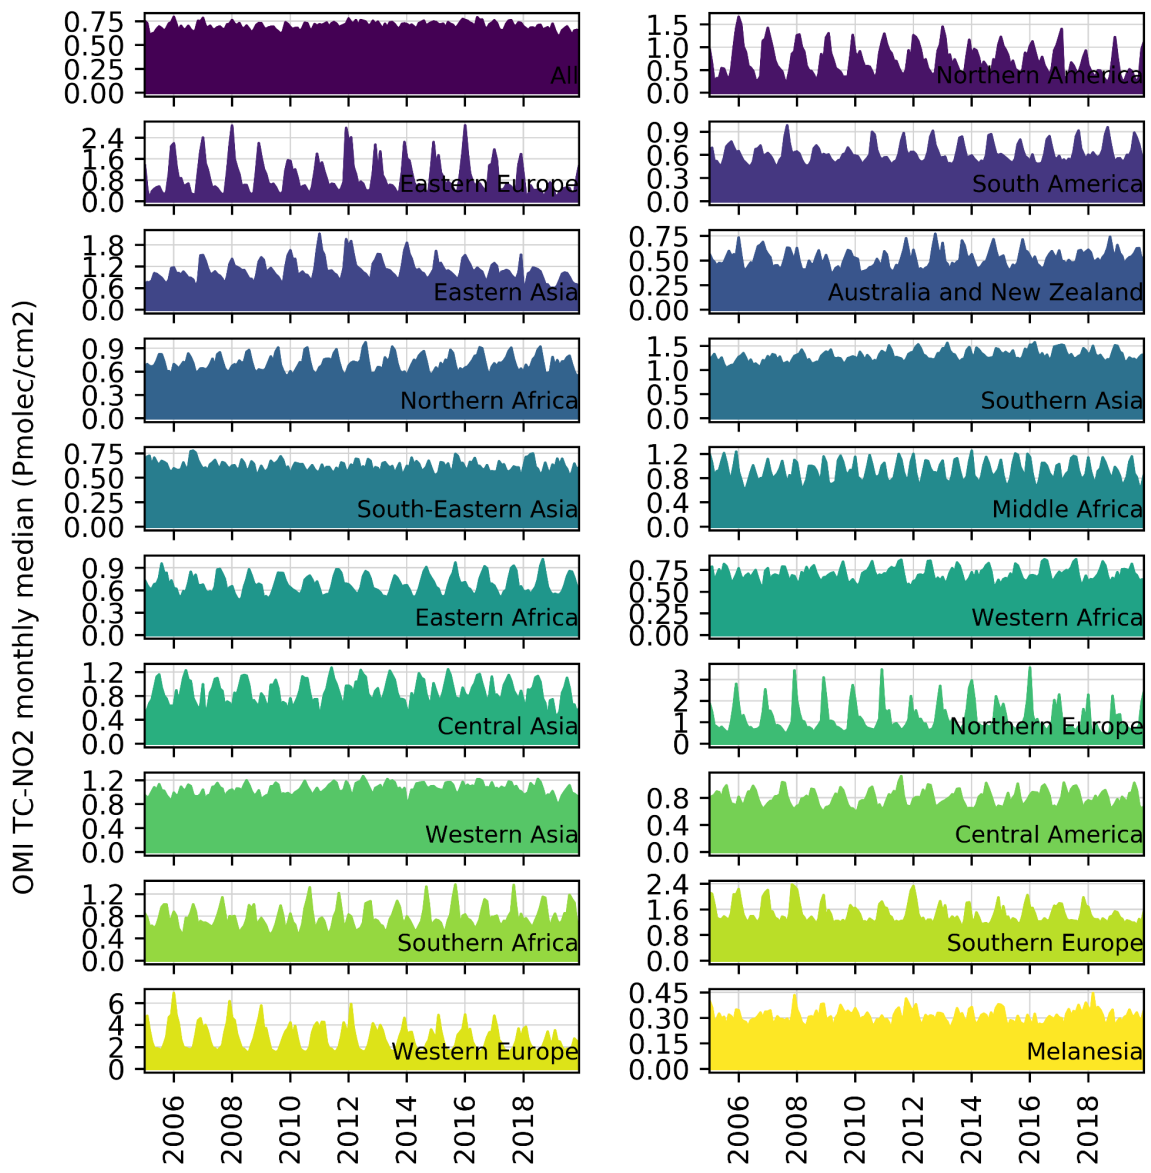

Figure S 3: Monthly regional time series of OMI TrC-NO<sub>2</sub>.



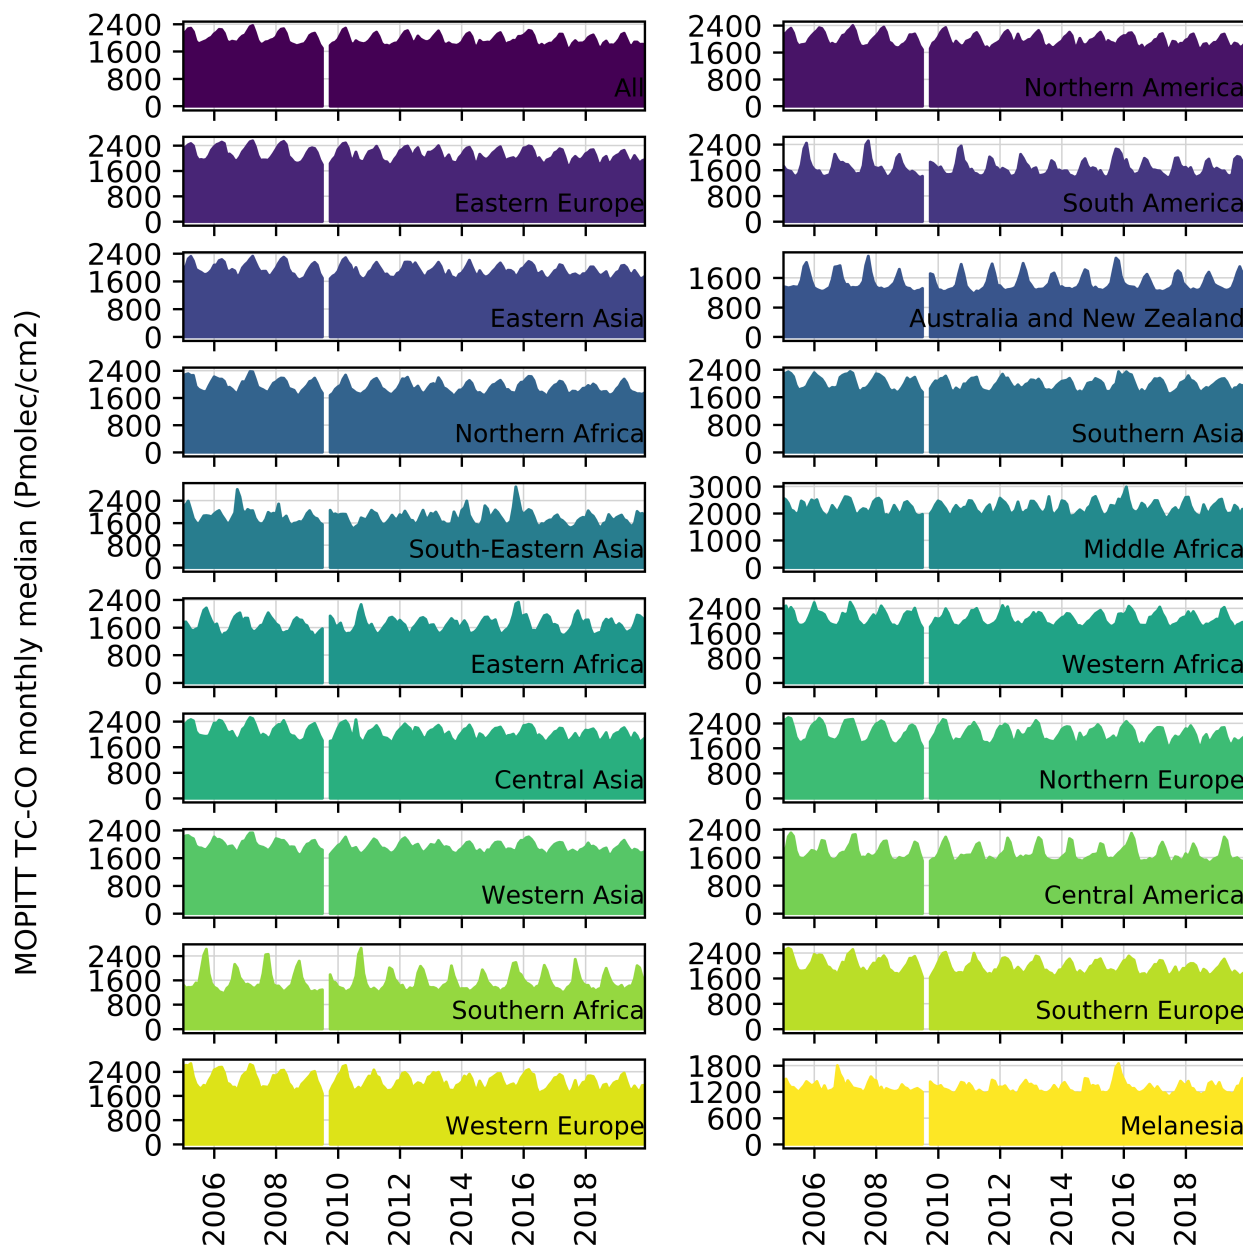

Figure S 4: Monthly regional time series of MOPITT TC-CO.

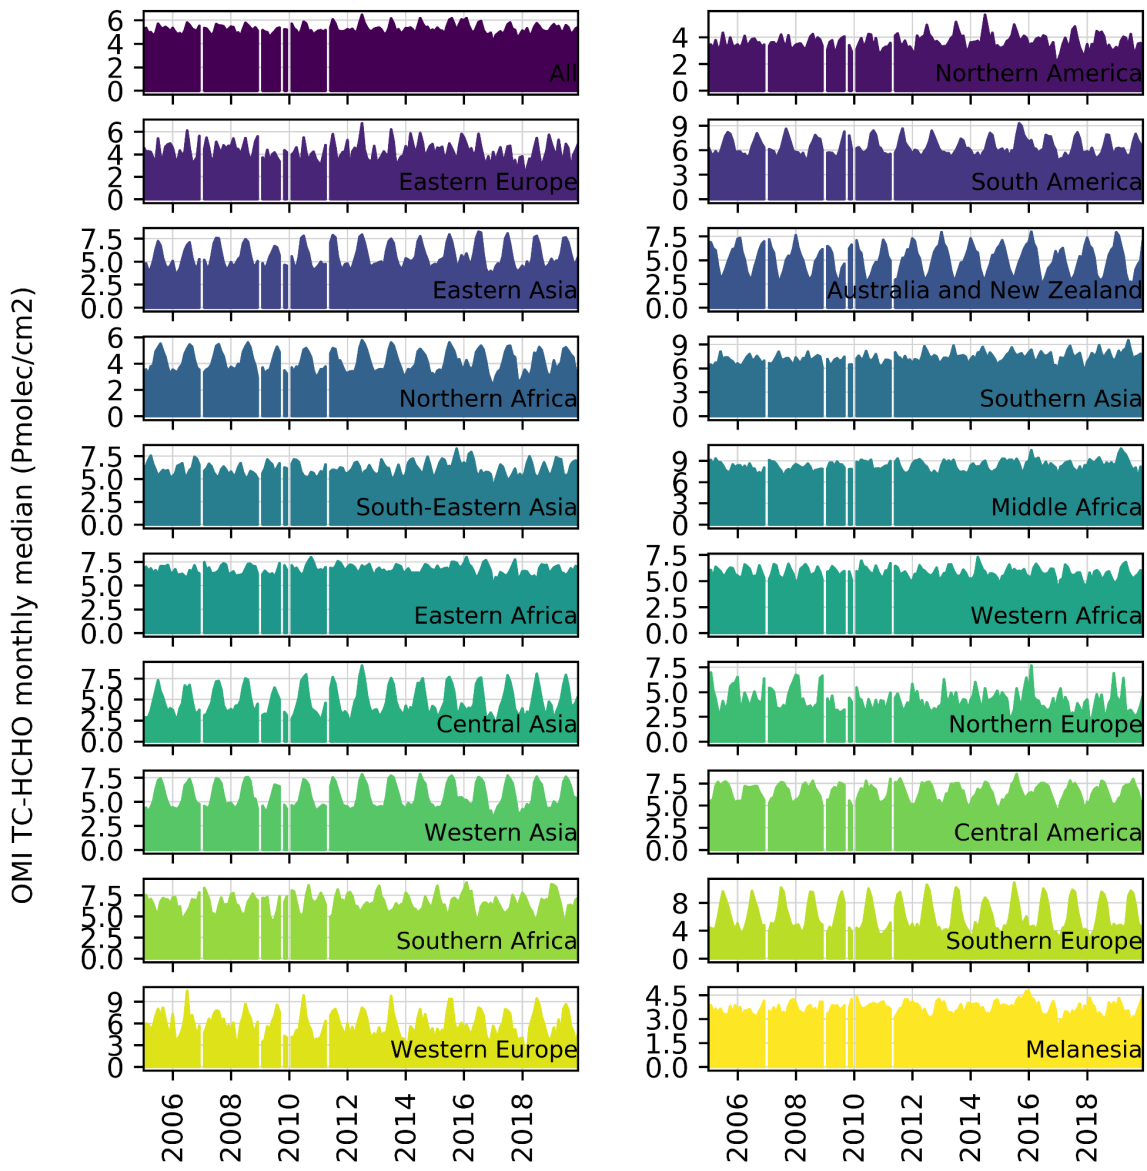

Figure S 5: Monthly regional time series of OMI TrC-HCHO.

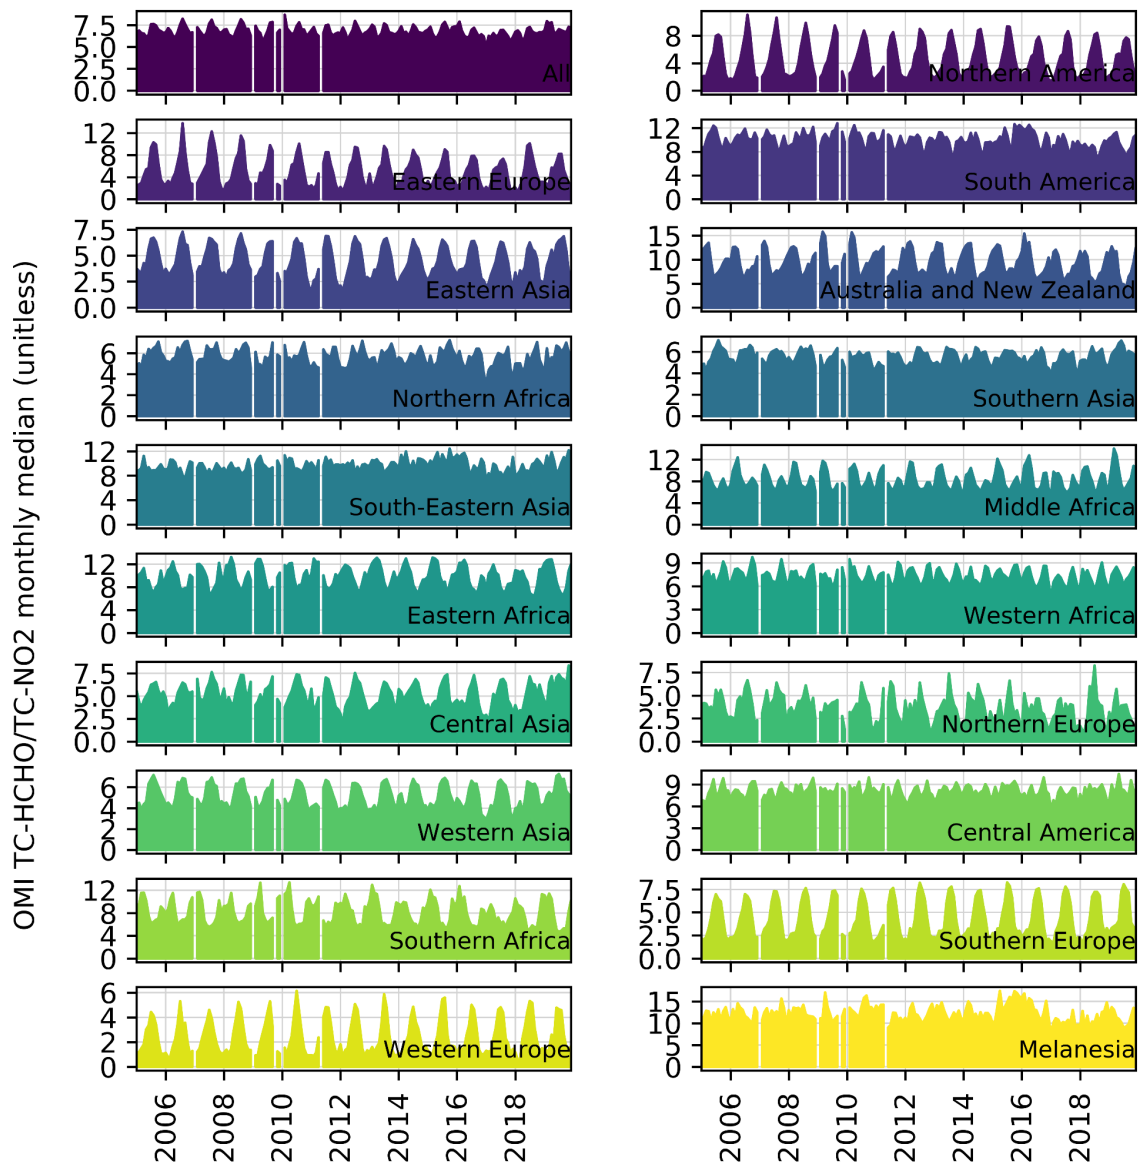

Figure S 6: Monthly regional time series of OMI TrC-HCHO/NO<sub>2</sub>.

## Seasonal O<sub>3</sub> trends

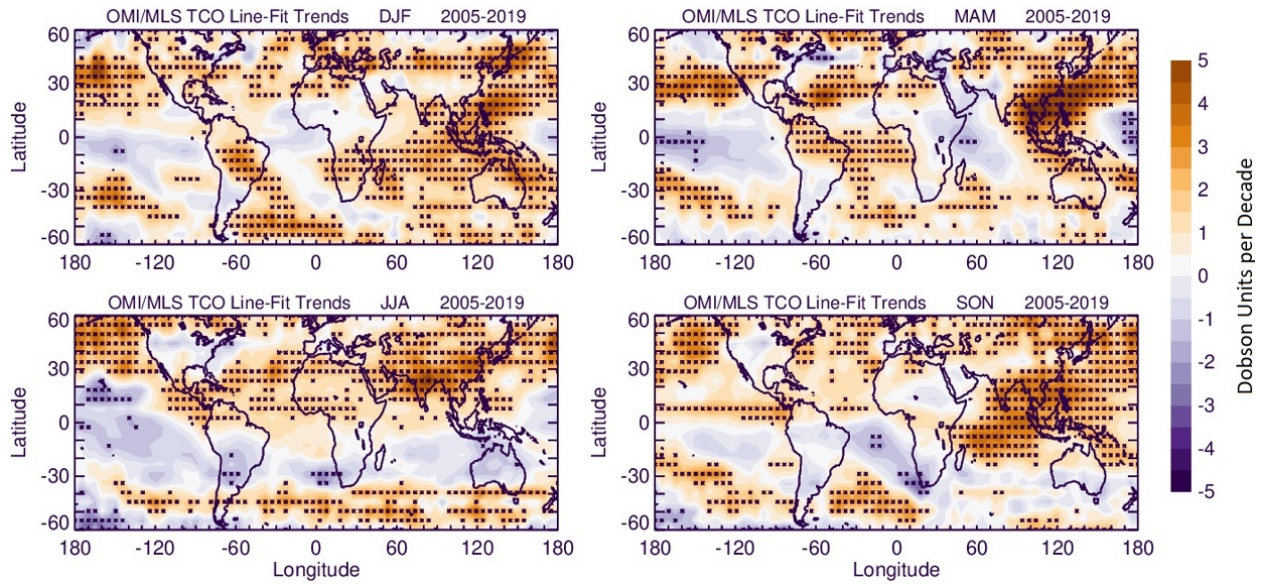

Figure S 7: Seasonal trends in tropospheric column ozone from 2005 to 2019. Asterisks denote 95% confidence trends.
